# Supplementary material for: Feed Restriction Improves Lipid Metabolism by Changing the Structure of the Cecal Microbial Community and Enhances the Meat Quality and Flavor of Bearded Chickens
Source: MDPI journal article supplement (doi:10.3390/ani12080970), 2022-04-08
Supplement: s1 [file s1]

Table S1. Primers for real-time quantitative PCR

| Genes                           | Primers (5'-3')              | Accession Number |
|---------------------------------|------------------------------|------------------|
| <i>FAS</i>                      | F: AAGCTGAAGGCTGCTGACAA      | NM_205155.3      |
|                                 | R: CCCTCATCAGTCACCAACAGA     |                  |
| <i>ACC</i>                      | F: TGTGGCACAGAAGAGGGAAT      | NM_205505.1      |
|                                 | R: CTCTCCCTCGTTTTGCAGGT      |                  |
| <i>PPAR-<math>\alpha</math></i> | F: GCTATCAGCTGTTCACTCGGT     | NM_001001464.1   |
|                                 | R: ACTCATTCAAAAGGAGACAGAGAAC |                  |
| <i>SREBP-1c</i>                 | F: GCCCTCGGATGTAGGCTCC       | NM_204126.2      |
|                                 | R: GGAGGCCAGGGGGTTAAAAG      |                  |
| <i><math>\beta</math>-actin</i> | F: GAGAAATTGTGCGTGACATCA     | NM_205518        |
|                                 | R: CCTGAACCTCTCATTGCCA       |                  |

*FAS* = fatty acid synthase; *ACC* = synthaseacetyl-CoA carboxylase; *PPAR- $\alpha$*  = peroxisome proliferators-activated receptors; *SREBP-1c* = sterol regulatory element binding protein-1c.
